# Supplementary material for: Climate Change and the Future of California's Endemic Flora
Source: PLoS One. 2008 Jun 25;3(6):e2502. doi: 10.1371/journal.pone.0002502 (PMC2481286; doi:10.1371/journal.pone.0002502)
Supplement: Table S2 — Maxent model performance for the 591 best known species. The first two columns list the number of specimens used to test and train the models. The next column lists the area under the receiver operating characteristic curve (AUC) evaluation statistic which ranges from 0.5 to 1. The next column lists the threshold used to create binary ranges from the cumulative index ranging from 0 to 100. The last column lists the prediction success evaluation statistic which is the percent of test specimens correctly predicted by the binary ranges. (0.10 MB XLS) [file pone.0002502.s009.xls]

## Sheet: Sheet1
Species	# Training specimens	# Test specimens	AUC	Threshold	Prediction Success
Abies magnifica var. shastensis	32	10	0.988	7.898	1
Acanthomintha lanceolata	43	14	0.985	29.779	1
Acer negundo var. californicum	42	14	0.969	28.116	0.928571
Achnatherum coronatum	66	22	0.95	15.75	0.909091
Achnatherum diegoense	40	12	0.986	14.023	0.916667
Achyrachaena mollis	148	49	0.905	11.289	0.897959
Acourtia microcephala	78	26	0.949	5.68	0.961538
Adenostoma sparsifolium	48	15	0.977	12.199	1
Agrostis hallii	48	15	0.968	14.659	0.866667
Allium burlewii	36	11	0.968	10.572	1
Allium crispum	45	14	0.97	21.64	1
Allium falcifolium	64	21	0.93	23.309	0.904762
Allium hyalinum	40	13	0.959	7.455	1
Allium peninsulare var. peninsulare	43	14	0.955	17.37	1
Allium praecox	60	19	0.987	19.661	1
Allium serra	53	17	0.934	3.056	0.941176
Allophyllum divaricatum	127	42	0.93	13.403	0.904762
Allophyllum glutinosum	132	43	0.967	13.051	0.906977
Amorpha californica var. californica	44	14	0.878	19.72	0.857143
Amsinckia eastwoodiae	72	24	0.933	24.314	0.875
Angelica tomentosa	36	12	0.948	20.192	0.916667
Antirrhinum cornutum	36	12	0.915	9.783	0.75
Antirrhinum kelloggii	86	28	0.972	9.976	0.964286
Antirrhinum multiflorum	88	29	0.946	13.876	0.896552
Antirrhinum vexillo-calyculatum subsp. breweri	47	15	0.926	3.078	0.933333
Antirrhinum vexillo-calyculatum subsp. intermedium	50	16	0.964	12.839	0.9375
Antirrhinum vexillo-calyculatum subsp. vexillo-calyculatum	63	21	0.976	17.598	0.904762
Antirrhinum virga	34	11	0.917	6.003	0.909091
Apiastrum angustifolium	199	66	0.952	4.658	1
Arabis sparsiflora var. arcuata	45	14	0.872	18.236	0.785714
Aralia californica	68	22	0.94	22.473	0.954545
Arctostaphylos canescens subsp. canescens	93	31	0.98	27.252	0.935484
Arctostaphylos glandulosa subsp. adamsii	38	12	0.956	34.106	0.916667
Arctostaphylos glandulosa subsp. glandulosa	192	63	0.965	22.262	0.904762
Arctostaphylos hookeri subsp. montana	36	11	1	52.152	1
Arctostaphylos manzanita subsp. elegans	32	10	0.996	46.654	0.9
Arctostaphylos manzanita subsp. manzanita	117	39	0.95	3.253	1
Arctostaphylos myrtifolia	40	13	0.891	80.891	0.769231
Arctostaphylos nummularia	65	21	0.997	3.574	1
Arctostaphylos parryana	34	11	0.982	2.753	1
Arctostaphylos pringlei subsp. drupacea	39	12	0.994	18.561	0.916667
Arctostaphylos purissima	33	10	0.998	24.011	1
Arctostaphylos tomentosa subsp. crustacea	115	36	0.983	2.207	1
Arctostaphylos tomentosa subsp. subcordata	33	10	0.999	48.291	0.9
Arctostaphylos viscida subsp. mariposa	63	20	0.903	0.215	0.9
Arctostaphylos viscida subsp. viscida	120	40	0.951	5.897	0.9
Arenaria congesta var. suffrutescens	44	14	0.952	14.919	0.928571
Aristolochia californica	62	20	0.956	3.661	0.9
Artemisia californica	192	62	0.959	3.248	0.967742
Aspidotis californica	119	39	0.927	15.412	0.923077
Astragalus douglasii var. douglasii	33	11	0.838	7.586	1
Astragalus douglasii var. parishii	42	13	0.984	25.316	0.923077
Astragalus gambelianus	176	58	0.922	11.241	0.948276
Astragalus lentiginosus var. nigricalycis	34	11	0.987	12.868	1
Astragalus miguelensis	45	13	1	46.212	1
Astragalus oxyphysus	41	13	0.958	2.973	0.923077
Astragalus pomonensis	51	16	0.915	6.749	0.8125
Astragalus trichopodus var. lonchus	59	19	0.951	3.582	0.842105
Atriplex californica	86	25	0.998	42.331	1
Atriplex coronata var. notatior	43	13	0.998	6.619	1
Atriplex leucophylla	55	16	0.993	23.294	0.9375
Atriplex watsonii	36	12	0.997	24.662	0.916667
Baccharis douglasii	100	33	0.943	8.212	0.909091
Berberis aquifolium var. dictyota	57	18	0.906	11.758	0.944444
Berberis nevinii	32	10	0.954	40.997	0.8
Blennosperma nanum var. nanum	78	25	0.91	12.004	0.92
Bloomeria crocea	59	19	0.925	4.58	1
Boykinia rotundifolia	44	14	0.958	2.946	0.928571
Brodiaea elegans subsp. elegans	123	41	0.896	9.509	0.926829
Brodiaea minor	37	12	0.959	5.762	1
Brodiaea orcuttii	32	10	0.965	7.124	1
Brodiaea terrestris subsp. kernensis	50	16	0.915	26.295	0.875
Brodiaea terrestris subsp. terrestris	40	13	0.9	1.658	0.846154
Bromus grandis	69	23	0.955	10.275	1
Calochortus albus	162	53	0.947	6.08	0.962264
Calochortus amabilis	66	22	0.955	5.685	0.909091
Calochortus amoenus	42	14	0.958	15.168	0.857143
Calochortus catalinae	53	16	0.892	21.959	0.75
Calochortus concolor	38	12	0.994	30.567	1
Calochortus invenustus	39	13	0.907	26.67	0.846154
Calochortus luteus	100	32	0.896	2.696	0.90625
Calochortus monophyllus	78	25	0.99	11.58	0.92
Calochortus nudus	39	12	0.96	2.989	1
Calochortus plummerae	60	19	0.975	23.542	0.947368
Calochortus splendens	176	58	0.942	3.672	0.948276
Calochortus superbus	39	13	0.934	19.347	0.692308
Calochortus umbellatus	33	11	0.995	45.668	0.909091
Calochortus venustus	105	34	0.92	13.828	0.941176
Calochortus weedii var. weedii	51	16	0.992	32.946	0.9375
Calycadenia fremontii	38	12	0.946	13.936	0.916667
Calycadenia mollis	36	12	0.986	0.946	1
Calycadenia oppositifolia	53	17	0.993	38.892	0.882353
Calycadenia pauciflora	36	11	0.985	8.575	1
Calycadenia truncata	83	27	0.938	3.016	0.925926
Calystegia macrostegia subsp. cyclostegia	34	11	0.98	13.943	1
Calystegia macrostegia subsp. intermedia	47	15	0.973	3.688	0.933333
Calystegia macrostegia subsp. macrostegia	33	11	0.999	10.147	0.909091
Calystegia macrostegia subsp. tenuifolia	47	15	0.977	34.089	0.933333
Calystegia malacophylla subsp. malacophylla	32	10	0.942	13.454	0.8
Calystegia occidentalis subsp. fulcrata	51	16	0.922	10.931	0.9375
Camissonia bistorta	243	80	0.957	22.734	0.8875
Camissonia boothii subsp. decorticans	60	20	0.906	12.706	0.9
Camissonia cheiranthifolia subsp. cheiranthifolia	47	14	0.991	19.638	0.928571
Camissonia cheiranthifolia subsp. suffruticosa	75	23	0.989	11.892	0.956522
Camissonia confusa	77	25	0.924	6.768	0.92
Camissonia graciliflora	65	20	0.92	40.323	0.8
Camissonia hirtella	311	102	0.94	4.514	0.960784
Camissonia ignota	64	21	0.96	30.327	0.904762
Camissonia micrantha	78	25	0.959	18.715	0.92
Camissonia ovata	37	11	0.99	10.25	1
Camissonia robusta	34	11	0.992	40.873	0.909091
Campanula prenanthoides	67	22	0.964	19.578	0.909091
Cardamine californica var. californica	42	13	0.831	7.664	0.846154
Cardamine californica var. integrifolia	48	16	0.925	10.018	0.9375
Carex brainerdii	46	15	0.959	14.145	0.866667
Carex globosa	54	18	0.947	14.461	0.888889
Carex lemmonii	63	21	0.974	13.154	1
Carex pachystachya	51	17	0.925	7.116	0.941176
Carex serratodens	63	20	0.941	31.809	0.85
Carex spissa	48	16	0.986	12.661	1
Carex triquetra	72	23	0.982	11.287	0.956522
Castilleja ambigua subsp. ambigua	52	16	0.993	14.044	1
Castilleja applegatei subsp. disticha	45	14	0.986	13.185	0.928571
Castilleja densiflora subsp. densiflora	79	25	0.966	5.951	0.92
Castilleja densiflora subsp. gracilis	34	11	0.961	13.33	1
Castilleja exserta subsp. latifolia	34	10	0.986	31.365	0.9
Castilleja lemmonii	72	24	0.978	7.021	0.916667
Castilleja lineariloba	66	22	0.955	7.497	0.909091
Castilleja mendocinensis	37	12	1	50.049	0.916667
Castilleja minor subsp. spiralis	105	34	0.904	6.845	0.941176
Castilleja rubicundula subsp. lithospermoides	62	20	0.968	18.514	0.95
Castilleja subinclusa subsp. franciscana	78	25	0.983	17.095	0.92
Castilleja subinclusa subsp. subinclusa	48	15	0.909	2.987	0.933333
Castilleja wightii	159	52	0.992	6.357	0.942308
Caulanthus heterophyllus var. heterophyllus	54	18	0.979	15.819	0.888889
Caulanthus heterophyllus var. pseudosimulans	52	17	0.992	13.958	0.941176
Ceanothus arboreus	32	10	0.999	47.305	0.9
Ceanothus crassifolius	154	51	0.971	23.544	0.941176
Ceanothus cuneatus var. cuneatus	236	77	0.887	14.306	0.909091
Ceanothus incanus	32	10	0.977	15.75	0.8
Ceanothus lemmonii	42	14	0.983	14.226	0.928571
Ceanothus leucodermis	238	79	0.949	11.739	0.936709
Ceanothus megacarpus var. insularis	39	12	0.984	12.108	0.916667
Ceanothus oliganthus var. oliganthus	95	31	0.981	15.842	0.935484
Ceanothus oliganthus var. sorediatus	93	31	0.98	8.884	0.967742
Ceanothus spinosus	58	19	0.987	9.811	1
Ceanothus tomentosus	129	42	0.976	24.389	0.928571
Ceanothus verrucosus	33	11	0.999	36.72	1
Centaurium davyi	33	10	0.989	39.398	0.9
Cercis occidentalis	100	33	0.944	21.123	0.848485
Cercocarpus betuloides var. blancheae	39	13	0.956	43.798	0.769231
Cercocarpus minutiflorus	68	22	0.991	14.09	1
Chaenactis artemisiifolia	86	28	0.952	9.423	0.892857
Chaenactis glabriuscula var. heterocarpha	61	20	0.946	16.398	0.9
Chamaebatia australis	47	15	0.997	30.278	0.933333
Chamaebatia foliolosa	58	19	0.958	8.914	0.947368
Cheilanthes clevelandii	60	19	0.993	33.275	1
Cheilanthes newberryi	66	22	0.989	4.463	0.954545
Chlorogalum pomeridianum var. pomeridianum	56	18	0.901	6.993	0.944444
Chorizanthe fimbriata var. fimbriata	69	22	0.973	7.135	0.954545
Chorizanthe fimbriata var. laciniata	40	13	0.995	15.304	1
Chorizanthe leptotheca	36	11	0.933	27.682	0.818182
Chorizanthe polygonoides var. longispina	49	16	0.97	21.728	0.875
Chorizanthe procumbens	53	17	0.964	2.466	1
Chorizanthe staticoides	158	51	0.941	6.149	0.921569
Chrysolepis chrysophylla var. minor	36	12	0.981	22.6	1
Cirsium occidentale var. californicum	128	42	0.898	5.332	0.928571
Cirsium occidentale var. occidentale	73	24	0.948	15.722	1
Cirsium quercetorum	32	10	0.972	6.32	0.9
Clarkia affinis	43	14	0.957	8.02	0.928571
Clarkia arcuata	48	15	0.979	2.824	1
Clarkia concinna subsp. concinna	70	23	0.964	14.779	1
Clarkia delicata	45	14	0.994	18.516	1
Clarkia dudleyana	74	24	0.955	12.484	0.958333
Clarkia heterandra	32	10	0.943	8.555	0.9
Clarkia purpurea subsp. quadrivulnera	324	107	0.899	7.819	0.934579
Clarkia rubicunda	94	30	0.989	3.139	0.966667
Clarkia similis	33	11	0.971	14.295	1
Clarkia unguiculata	165	55	0.909	6.38	0.927273
Clarkia williamsonii	59	19	0.955	1.171	1
Claytonia exigua subsp. exigua	102	33	0.935	9.291	0.909091
Claytonia gypsophiloides	38	12	0.983	27.486	1
Clematis lasiantha	168	55	0.928	10.812	0.927273
Cneoridium dumosum	57	18	0.995	40.532	0.888889
Collinsia bartsiifolia var. bartsiifolia	49	16	0.917	16.129	1
Collinsia childii	72	23	0.94	11.816	0.782609
Collinsia concolor	83	27	0.985	11.261	1
Collinsia greenei	36	11	0.988	29.172	1
Collinsia heterophylla	372	123	0.903	4.748	0.95935
Collinsia parryi	32	10	0.876	6.265	0.8
Collinsia sparsiflora var. arvensis	38	12	0.991	5.723	1
Collinsia sparsiflora var. collina	72	24	0.917	3.092	0.958333
Collinsia sparsiflora var. sparsiflora	44	14	0.87	15.226	0.857143
Collinsia tinctoria	114	37	0.954	7.519	0.972973
Collinsia torreyi var. wrightii	47	15	0.969	9.482	0.933333
Comarostaphylis diversifolia subsp. planifolia	33	11	0.928	13.775	0.909091
Convolvulus simulans	53	17	0.993	38.847	1
Cordylanthus pilosus subsp. pilosus	60	19	0.936	20.288	0.789474
Cordylanthus rigidus subsp. rigidus	117	38	0.944	7.344	1
Cordylanthus rigidus subsp. setigerus	78	25	0.932	24.541	0.88
Cordylanthus tenuis subsp. tenuis	96	32	0.972	17.286	0.96875
Coreopsis gigantea	40	13	0.988	5.014	0.846154
Cryptantha clevelandii	142	46	0.977	12.525	0.956522
Cryptantha hispidula	32	10	0.992	12.942	0.9
Cryptantha micromeres	72	24	0.971	4.813	1
Cryptantha microstachys	174	58	0.959	8.735	0.948276
Cupressus forbesii	39	13	0.993	15.968	0.923077
Cupressus macnabiana	54	18	0.986	16.447	0.944444
Cupressus sargentii	77	25	0.983	10.067	1
Cycladenia humilis var. humilis	35	11	0.968	13.898	0.909091
Delphinium gracilentum	61	20	0.91	15.149	0.85
Delphinium hesperium subsp. pallescens	41	13	0.908	15.753	0.846154
Delphinium patens subsp. patens	46	15	0.944	7.782	0.933333
Delphinium variegatum subsp. variegatum	76	25	0.915	27.923	0.76
Dendromecon rigida	177	58	0.907	6.358	0.896552
Dicentra chrysantha	159	52	0.935	28.887	0.884615
Dichelostemma volubile	57	19	0.955	11.067	0.842105
Dichondra occidentalis	34	11	0.992	25.156	1
Dirca occidentalis	40	12	0.998	44.439	1
Dodecatheon clevelandii subsp. patulum	60	19	0.914	6.366	0.947368
Downingia bicornuta var. picta	44	14	0.988	15.097	0.928571
Downingia concolor var. concolor	39	12	0.987	51.412	0.833333
Downingia ornatissima var. eximia	43	14	0.976	0.138	0.928571
Downingia ornatissima var. ornatissima	49	16	0.982	18.505	0.9375
Downingia pulchella	42	14	0.947	30.89	0.857143
Draba lemmonii var. lemmonii	36	11	0.995	11.004	1
Draperia systyla	48	16	0.964	21.325	0.875
Dudleya variegata	34	11	0.993	0.932	1
Encelia californica	115	37	0.989	10.013	1
Epilobium canum subsp. canum	170	55	0.949	5.027	0.963636
Epilobium cleistogamum	37	12	0.973	10.875	0.916667
Eriastrum densifolium subsp. austromontanum	35	11	0.966	50.301	0.909091
Eriastrum densifolium subsp. densifolium	117	37	0.926	11.81	0.891892
Ericameria ericoides	49	16	0.987	1.09	0.9375
Ericameria parishii var. parishii	43	14	0.993	19.836	1
Erigeron glaucus	59	19	0.997	35.576	1
Erigeron inornatus var. inornatus	84	27	0.916	6.489	0.925926
Erigeron petrophilus var. sierrensis	33	11	0.995	26.534	0.909091
Eriodictyon californicum	159	53	0.927	6.142	0.962264
Eriodictyon crassifolium var. crassifolium	42	13	0.972	46.182	0.923077
Eriodictyon crassifolium var. nigrescens	51	16	0.943	10.585	0.9375
Eriogonum arborescens	33	10	1	30.158	0.9
Eriogonum cithariforme	51	17	0.963	0.369	1
Eriogonum dasyanthemum	36	11	0.992	36.862	1
Eriogonum fasciculatum var. fasciculatum	51	17	0.987	6.046	1
Eriogonum gracile var. gracile	96	31	0.969	25.389	0.967742
Eriogonum grande var. grande	34	11	0.976	49.181	0.818182
Eriogonum luteolum var. luteolum	70	23	0.966	7.198	1
Eriogonum nudum var. auriculatum	54	17	0.967	17.116	0.882353
Eriogonum parvifolium	49	15	0.995	18.814	0.933333
Eriogonum umbellatum var. munzii	37	11	0.985	31.374	0.909091
Eriogonum wrightii var. trachygonum	42	13	0.918	20.512	0.923077
Eriophyllum lanatum var. arachnoideum	47	15	0.997	21.414	1
Eriophyllum lanatum var. croceum	52	17	0.946	14.753	0.882353
Eriophyllum lanatum var. grandiflorum	111	37	0.962	22.188	0.891892
Eriophyllum multicaule	59	19	0.946	23.535	0.894737
Eryngium aristulatum var. aristulatum	71	23	0.961	9.009	1
Eryngium castrense	101	33	0.972	8.053	0.969697
Eryngium vaseyi	33	10	0.933	1.164	1
Erysimum franciscanum	39	13	0.999	44.017	0.923077
Eschscholzia lobbii	95	31	0.951	4.862	0.967742
Eucrypta chrysanthemifolia var. chrysanthemifolia	134	44	0.975	18.438	0.931818
Fraxinus dipetala	99	32	0.91	7.039	0.9375
Fremontodendron californicum subsp. californicum	51	17	0.911	35.033	0.823529
Galium angustifolium subsp. angustifolium	193	63	0.945	5.554	0.952381
Galium angustifolium subsp. foliosum	42	14	1	61.052	1
Galium bolanderi	142	47	0.925	16.015	0.87234
Galium californicum subsp. californicum	75	25	0.95	16.263	0.8
Galium nuttallii subsp. nuttallii	39	12	0.988	17.341	0.916667
Galium porrigens var. tenue	50	16	0.951	8.474	0.875
Garrya elliptica	80	26	0.976	1.107	0.961538
Geranium californicum	35	11	0.979	36.279	1
Gilia achilleifolia subsp. achilleifolia	96	31	0.97	11.331	0.967742
Gilia achilleifolia subsp. multicaulis	46	15	0.949	1.179	1
Gilia angelensis	222	73	0.966	26.98	0.863014
Gilia capitata subsp. abrotanifolia	163	54	0.915	13.63	0.944444
Gilia capitata subsp. mediomontana	32	10	0.98	13.401	1
Gilia capitata subsp. pedemontana	42	13	0.979	9.006	0.923077
Gilia tricolor subsp. diffusa	60	19	0.926	19.25	1
Gilia tricolor subsp. tricolor	75	25	0.905	14.283	0.88
Gnaphalium bicolor	102	33	0.961	14.401	0.939394
Gnaphalium canescens subsp. beneolens	53	17	0.836	8.145	0.882353
Gnaphalium canescens subsp. microcephalum	78	25	0.88	13.008	0.84
Gnaphalium ramosissimum	37	12	0.955	6.966	0.833333
Guillenia flavescens	45	15	0.984	4.855	0.933333
Gutierrezia californica	149	49	0.937	20.099	0.836735
Hackelia nervosa	38	12	0.985	6.732	1
Hazardia squarrosa var. grindelioides	72	23	0.982	15.37	0.956522
Hazardia whitneyi var. whitneyi	33	10	0.959	12.478	1
Helenium bigelovii	142	47	0.947	13.232	0.957447
Helianthemum scoparium	141	47	0.952	2.933	0.978723
Helianthus californicus	36	12	0.909	20.177	0.833333
Helianthus gracilentus	126	42	0.962	13.264	0.928571
Hemizonia congesta subsp. luzulifolia	131	43	0.966	21.866	0.883721
Hemizonia fasciculata	110	36	0.983	14.182	0.972222
Hemizonia paniculata	93	31	0.983	5.276	0.967742
Hemizonia pungens subsp. laevis	53	17	0.971	43.692	0.882353
Hesperevax sparsiflora var. sparsiflora	35	11	0.959	30.838	0.818182
Hesperocnide tenella	93	31	0.94	4.31	1
Hesperolinon adenophyllum	34	11	0.987	29.843	0.909091
Hesperolinon californicum	37	12	0.93	2.761	0.916667
Hesperolinon disjunctum	59	19	0.981	10.959	0.842105
Hesperolinon spergulinum	39	13	0.995	32.672	0.923077
Heterotheca sessiliflora subsp. echioides	59	19	0.899	4.802	1
Hoita macrostachya	72	24	0.85	7.902	0.833333
Hoita orbicularis	48	16	0.926	19.605	0.9375
Holocarpha heermannii	42	14	0.853	0.571	0.928571
Hordeum intercedens	65	20	0.971	31.436	0.9
Horkelia californica subsp. dissita	46	15	0.949	8.228	0.866667
Hypericum concinnum	57	19	0.971	14.461	1
Iris macrosiphon	96	32	0.947	22.204	0.8125
Isopyrum occidentale	34	11	0.943	15.717	1
Ivesia santolinoides	51	17	0.979	9.388	0.941176
Jepsonia parryi	33	11	0.991	7.482	0.909091
Juglans californica var. californica	34	11	0.971	22.678	1
Juncus bufonius var. congestus	56	18	0.95	46.101	0.777778
Juncus leiospermus var. leiospermus	41	13	0.995	9.14	0.923077
Juncus textilis	52	16	0.92	8.015	0.875
Juncus triformis	54	18	0.871	60.986	0.611111
Keckiella cordifolia	138	45	0.956	9.93	0.911111
Keckiella corymbosa	48	15	0.937	9.788	0.933333
Keckiella ternata var. ternata	34	11	0.976	26.106	0.818182
Lagophylla glandulosa	51	16	0.974	8.035	0.9375
Lasthenia ferrisiae	33	10	0.941	2.229	0.9
Lasthenia fremontii	118	39	0.945	2.989	0.974359
Lasthenia glabrata subsp. glabrata	56	18	0.92	15.576	0.888889
Lasthenia minor	85	28	0.95	4.456	1
Lathyrus jepsonii var. californicus	59	19	0.889	4.62	1
Lathyrus sulphureus	64	21	0.97	10.559	1
Lathyrus vestitus var. alefeldii	93	31	0.988	12.975	0.967742
Lathyrus vestitus var. vestitus	136	44	0.947	6.845	0.931818
Layia chrysanthemoides	64	20	0.941	16.58	1
Layia fremontii	86	28	0.975	4.09	0.964286
Layia gaillardioides	66	21	0.956	19.126	0.904762
Lepechinia calycina	59	19	0.93	4.476	0.947368
Lepidium virginicum var. robinsonii	66	22	0.972	18.22	0.954545
Leptodactylon californicum	60	19	0.941	1.981	1
Lessingia filaginifolia var. filaginifolia	70	23	0.973	22.726	0.956522
Lessingia glandulifera var. glandulifera	67	22	0.829	58.02	0.545455
Lessingia leptoclada	75	24	0.972	17.373	0.958333
Lessingia nemaclada	87	29	0.926	8.516	0.965517
Lessingia ramulosa	47	15	0.975	35.962	0.933333
Lilium humboldtii subsp. ocellatum	59	19	0.974	9.125	0.947368
Lilium pardalinum subsp. pardalinum	32	10	0.818	16.736	0.6
Lilium parvum	39	13	0.971	21.091	0.923077
Limnanthes alba subsp. alba	39	12	0.977	19.068	0.916667
Limnanthes douglasii subsp. nivea	35	11	0.978	15.93	1
Limnanthes douglasii subsp. rosea	84	28	0.971	12.085	0.964286
Limnanthes striata	33	11	0.898	8.58	0.818182
Linanthus acicularis	33	11	0.96	21.678	0.818182
Linanthus ambiguus	42	14	0.934	8.357	0.857143
Linanthus androsaceus	116	38	0.959	3.819	1
Linanthus bicolor	130	43	0.897	7.009	0.906977
Linanthus ciliatus	198	66	0.905	25.564	0.80303
Linanthus dianthiflorus	93	30	0.976	12.917	1
Linanthus filipes	84	27	0.97	2.918	1
Linanthus montanus	57	19	0.974	22.032	0.947368
Linanthus parviflorus	186	61	0.907	3.145	0.983607
Lithocarpus densiflorus var. echinoides	34	11	0.949	4.864	1
Lithophragma affine	133	43	0.924	6.404	0.953488
Lithophragma bolanderi	105	35	0.929	5.344	1
Lithophragma cymbalaria	32	10	0.984	19.959	0.9
Lithophragma heterophyllum	69	23	0.958	17.093	0.913043
Lomatium caruifolium var. caruifolium	42	14	0.863	4.937	0.857143
Lomatium caruifolium var. denticulatum	32	10	0.892	2.258	0.9
Lomatium dasycarpum subsp. dasycarpum	131	42	0.92	7.611	0.904762
Lomatium lucidum	71	23	0.98	31.006	1
Lonicera subspicata var. denudata	138	45	0.967	12.626	1
Lotus argophyllus var. argophyllus	94	30	0.921	21.155	0.833333
Lotus formosissimus	48	15	0.994	7.624	0.933333
Lotus grandiflorus var. grandiflorus	46	14	0.915	11.715	1
Lotus hamatus	132	43	0.958	23.906	0.860465
Lupinus albifrons var. albifrons	57	18	0.921	18.901	0.888889
Lupinus albifrons var. collinus	36	12	0.839	3.939	0.916667
Lupinus albifrons var. douglasii	47	15	0.999	52.365	0.933333
Lupinus arboreus	92	28	0.975	20.31	0.964286
Lupinus benthamii	64	21	0.91	7.382	0.952381
Lupinus chamissonis	37	12	0.979	14.77	0.916667
Lupinus excubitus var. austromontanus	51	16	0.956	16.309	0.875
Lupinus formosus var. formosus	40	12	0.904	16.712	0.833333
Lupinus formosus var. robustus	35	11	0.835	21.153	0.727273
Lupinus grayi	40	13	0.961	19.998	0.923077
Lupinus hirsutissimus	152	50	0.953	10.875	0.9
Lupinus microcarpus var. densiflorus	210	69	0.902	16.499	0.898551
Lupinus stiversii	54	18	0.967	5.809	0.944444
Lupinus succulentus	190	61	0.948	10.832	0.983607
Lupinus truncatus	189	62	0.98	17.396	0.983871
Lyonothamnus floribundus subsp. floribundus	43	14	1	47.16	1
Malacothamnus densiflorus	42	14	0.994	32.252	1
Malacothrix floccifera	121	39	0.92	8.72	0.897436
Malacothrix incana	43	14	0.999	36.149	1
Malacothrix saxatilis var. implicata	35	11	0.999	23.478	1
Malosma laurina	91	29	0.982	10.496	0.965517
Marah watsonii	35	11	0.989	30.241	0.909091
Meconella californica	48	16	0.922	2.713	0.9375
Meconella denticulata	33	11	0.94	11.843	0.818182
Melica californica	164	54	0.888	9.981	0.87037
Melica torreyana	109	35	0.956	6.185	0.942857
Mentzelia lindleyi	34	11	0.919	37.072	0.636364
Micropus californicus var. californicus	180	59	0.908	16.83	0.847458
Microseris acuminata	33	10	0.943	3.961	0.9
Microseris douglasii subsp. douglasii	105	34	0.926	14.608	0.852941
Microseris douglasii subsp. platycarpha	47	14	0.99	23.593	1
Microseris douglasii subsp. tenella	35	11	0.954	3.33	1
Mimulus bicolor	102	34	0.975	4.443	0.970588
Mimulus bolanderi	69	22	0.955	11.851	0.909091
Mimulus brevipes	178	58	0.964	25.083	0.931034
Mimulus clevelandii	39	13	0.993	11.686	0.923077
Mimulus congdonii	36	11	0.977	42.628	0.818182
Mimulus glaucescens	57	19	0.983	2.746	0.947368
Mimulus kelloggii	81	27	0.991	13.489	0.962963
Mimulus laciniatus	32	10	0.949	11.773	1
Mimulus latidens	32	10	0.908	7.8	0.9
Mimulus layneae	122	40	0.952	15.125	0.925
Mimulus torreyi	135	45	0.984	27.655	0.933333
Mimulus whitneyi	48	16	0.992	8.423	1
Minuartia californica	69	23	0.958	14.469	0.956522
Monardella lanceolata	124	41	0.907	12.96	0.878049
Monardella sheltonii	87	28	0.956	4.633	0.928571
Monardella villosa subsp. villosa	63	20	0.942	28.088	0.85
Monolopia major	54	18	0.964	18.674	0.944444
Monolopia stricta	42	14	0.975	3.906	0.928571
Nassella cernua	105	34	0.939	17.828	0.911765
Nassella lepida	133	43	0.975	28.955	0.906977
Nassella pulchra	144	47	0.961	9.142	0.978723
Navarretia atractyloides	117	38	0.954	3.86	0.947368
Navarretia cotulifolia	38	12	0.977	26.03	0.916667
Navarretia filicaulis	51	16	0.991	11.952	1
Navarretia fossalis	36	11	0.962	47.536	0.818182
Navarretia jaredii	38	12	0.964	17.48	0.833333
Navarretia viscidula	75	24	0.952	16.87	0.916667
Nemophila heterophylla	198	66	0.942	2.931	0.984848
Nemophila maculata	64	21	0.964	4.274	1
Neostapfia colusana	33	10	0.995	10.841	1
Odontostomum hartwegii	36	12	0.982	4.728	0.916667
Orcuttia inaequalis	34	11	0.997	38.928	0.909091
Orobanche bulbosa	53	17	0.925	21.003	0.882353
Osmadenia tenella	56	18	0.991	23.079	0.944444
Oxalis albicans subsp. californica	50	16	0.97	9.238	0.9375
Paeonia californica	126	42	0.975	4.611	0.97619
Papaver californicum	51	16	0.978	16.136	1
Parvisedum pumilum	87	28	0.962	7.472	0.964286
Pedicularis densiflora	147	49	0.924	5.36	0.979592
Pellaea andromedifolia	200	66	0.944	22.235	0.924242
Penstemon azureus var. angustissimus	34	11	0.944	6.226	0.909091
Penstemon azureus var. azureus	42	14	0.943	19.659	1
Penstemon caesius	33	11	0.991	13.574	1
Penstemon heterophyllus var. heterophyllus	39	13	0.911	15.216	1
Penstemon heterophyllus var. purdyi	60	19	0.951	17.462	0.894737
Penstemon laetus var. laetus	44	14	0.943	7.657	1
Penstemon laetus var. leptosepalus	48	16	0.997	36.17	1
Penstemon neotericus	33	10	0.967	19.221	1
Pentachaeta aurea	54	17	0.991	44.816	1
Pentagramma triangularis subsp. viscosa	39	12	0.998	53.377	0.916667
Perideridia kelloggii	63	20	0.949	8.667	0.95
Phacelia brachyloba	137	45	0.947	7.037	0.955556
Phacelia breweri	57	18	0.985	27.417	0.888889
Phacelia californica	69	22	0.928	53.511	0.772727
Phacelia corymbosa	40	12	0.884	7.749	1
Phacelia davidsonii	51	17	0.967	62.109	0.882353
Phacelia divaricata	48	16	0.983	22.372	1
Phacelia egena	96	32	0.916	12.953	0.90625
Phacelia grandiflora	62	20	0.968	9.962	0.9
Phacelia imbricata subsp. imbricata	48	15	0.868	3.054	0.866667
Phacelia viscida	69	22	0.978	9.684	1
Phalaris lemmonii	74	24	0.941	16.268	1
Phlox speciosa subsp. occidentalis	53	17	0.895	4.265	0.941176
Phyllodoce breweri	69	23	0.949	3.836	0.956522
Pickeringia montana var. montana	61	20	0.963	6.052	0.95
Pinus coulteri	62	20	0.943	21.67	0.8
Pinus muricata	53	17	0.979	50.653	0.882353
Plagiobothrys collinus var. gracilis	39	12	0.985	3.599	1
Plagiobothrys greenei	45	15	0.97	11.816	0.866667
Plectritis ciliosa subsp. insignis	58	19	0.852	11.881	0.789474
Pleuropogon californicus	67	22	0.965	5.639	0.954545
Poa douglasii	37	12	0.993	12.182	0.916667
Pogogyne douglasii	42	13	0.973	21.506	1
Pogogyne zizyphoroides	36	12	0.988	26.078	1
Polygala californica	41	13	0.95	3.214	0.923077
Polygala cornuta var. cornuta	39	13	0.971	3.005	1
Polygala cornuta var. fishiae	44	14	0.987	16.595	0.928571
Polypodium californicum	168	55	0.978	16.084	0.963636
Polystichum imbricans subsp. curtum	49	16	0.903	8.507	0.9375
Prunus ilicifolia subsp. ilicifolia	54	18	0.959	5.323	1
Pseudobahia heermannii	72	23	0.985	10.22	0.956522
Pseudotsuga macrocarpa	43	13	0.946	24.438	0.692308
Ptelea crenulata	75	25	0.976	22.635	1
Quercus agrifolia var. agrifolia	50	16	0.932	5.966	0.875
Quercus agrifolia var. oxyadenia	58	19	0.978	20.324	0.947368
Quercus berberidifolia	328	109	0.924	4.708	0.963303
Quercus douglasii	269	89	0.932	7.633	0.955056
Quercus dumosa	151	50	0.963	10.927	0.96
Quercus durata var. durata	42	14	0.929	4.665	0.928571
Quercus engelmannii	156	52	0.97	18.84	0.942308
Quercus lobata	188	62	0.915	6.587	0.919355
Quercus parvula var. parvula	36	11	0.956	23.604	0.727273
Quercus parvula var. shrevei	55	17	0.987	20.023	0.882353
Quercus sadleriana	40	13	0.971	26.547	0.923077
Quercus tomentella	76	24	0.991	4.744	0.875
Quercus wislizeni var. frutescens	99	32	0.935	11.983	0.9375
Ranunculus bonariensis var. trisepalus	34	11	0.989	23.712	0.909091
Ranunculus canus	72	24	0.908	22.448	0.833333
Rhamnus crocea	133	43	0.962	5.987	0.976744
Rhamnus pilosa	42	13	0.996	28.249	0.846154
Rhus integrifolia	135	45	0.991	19.353	0.977778
Ribes amarum	34	11	0.979	24.582	1
Ribes indecorum	124	41	0.983	24.94	0.95122
Ribes speciosum	76	25	0.976	9.5	1
Salix breweri	48	16	0.99	10.791	1
Salix delnortensis	47	15	1	79.296	1
Salvia leucophylla	88	29	0.957	5.453	0.931034
Salvia sonomensis	100	33	0.967	17.875	0.969697
Salvia spathacea	59	19	0.978	15.936	1
Sanicula arguta	133	43	0.983	6.526	1
Sanicula bipinnata	95	31	0.911	2.051	0.935484
Sanicula laciniata	39	12	0.974	7.374	1
Sarcodes sanguinea	32	10	0.952	7.427	0.9
Saxifraga bryophora	48	16	0.969	24.322	0.9375
Saxifraga californica	138	46	0.893	10.132	0.869565
Scrophularia californica subsp. floribunda	100	33	0.969	33.696	0.939394
Scutellaria californica	111	36	0.965	19.434	0.944444
Scutellaria siphocampyloides	96	32	0.925	14.289	0.90625
Scutellaria tuberosa	154	51	0.925	16.602	0.882353
Selaginella hansenii	43	14	0.954	4.583	0.928571
Senecio aronicoides	106	35	0.892	7.302	0.942857
Senecio flaccidus var. douglasii	134	44	0.903	14.068	0.863636
Sequoia sempervirens	50	16	0.948	3.939	0.9375
Sequoiadendron giganteum	38	12	0.943	2.129	0.833333
Sidalcea diploscypha	77	25	0.909	2.208	0.96
Sidalcea glaucescens	69	23	0.977	12.965	0.913043
Sidalcea hartwegii	81	27	0.936	5.555	0.888889
Sidalcea hirsuta	42	13	0.96	5.846	0.923077
Sidalcea malviflora subsp. laciniata	50	15	0.954	19.114	0.8
Sidalcea malviflora subsp. malviflora	56	17	0.952	33.989	0.823529
Sidalcea malviflora subsp. sparsifolia	54	18	0.961	35.516	0.888889
Sidalcea ranunculacea	35	11	0.987	0.69	1
Silene californica	130	43	0.944	29.382	0.837209
Silene laciniata subsp. major	57	19	0.935	36.064	0.894737
Silene multinervia	41	13	0.973	11.825	1
Silene verecunda subsp. platyota	46	15	0.911	8.62	0.866667
Stachys bullata	81	27	0.945	10.272	0.888889
Stachys pycnantha	53	17	0.912	19.076	0.882353
Stephanomeria cichoriacea	36	11	0.924	10.081	1
Stephanomeria diegensis	70	23	0.981	20.381	0.913043
Stephanomeria exigua subsp. deanei	70	23	0.971	22.943	0.869565
Stephanomeria virgata subsp. pleurocarpa	82	27	0.889	28.77	0.814815
Streptanthus barbiger	46	15	0.994	20.846	1
Streptanthus breweri var. breweri	38	12	0.977	6.561	1
Streptanthus diversifolius	35	11	0.985	6.09	1
Streptanthus glandulosus subsp. glandulosus	63	20	0.948	2.196	1
Streptanthus polygaloides	68	22	0.986	3.912	1
Streptanthus tortuosus var. orbiculatus	77	25	0.958	20.203	0.96
Streptanthus tortuosus var. suffrutescens	32	10	0.974	14.28	0.9
Styrax officinalis var. redivivus	54	17	0.931	8.151	0.941176
Suaeda taxifolia	62	19	0.999	42.524	0.947368
Tauschia arguta	130	43	0.922	17.733	0.813953
Tauschia hartwegii	49	15	0.937	11.396	0.933333
Tauschia kelloggii	33	11	0.955	5.264	0.909091
Tetracoccus dioicus	36	12	0.957	32.262	0.833333
Tetradymia comosa	54	18	0.959	26.327	0.777778
Thermopsis macrophylla var. macrophylla	39	13	0.959	4.565	1
Thysanocarpus radians	69	22	0.973	12.7	0.909091
Trichostema laxum	69	22	0.966	13.589	0.954545
Trichostema parishii	123	40	0.976	10.066	0.95
Trifolium bifidum var. bifidum	38	12	0.969	15.333	1
Trifolium breweri	57	19	0.952	19.428	0.947368
Trifolium depauperatum var. amplectens	90	29	0.927	10.639	0.931034
Trifolium depauperatum var. truncatum	60	19	0.903	5.191	1
Trillium chloropetalum	60	19	0.972	16.487	0.947368
Triphysaria eriantha subsp. eriantha	154	51	0.921	18.891	0.921569
Triphysaria eriantha subsp. rosea	42	13	0.932	10.388	0.769231
Triphysaria versicolor subsp. faucibarbata	49	16	0.987	16.305	1
Triteleia bridgesii	33	11	0.993	31.172	1
Triteleia ixioides subsp. anilina	56	18	0.936	3.483	0.944444
Triteleia ixioides subsp. scabra	66	22	0.959	4.677	1
Triteleia laxa	167	55	0.917	17.01	0.890909
Umbellularia californica	146	48	0.932	34.414	0.791667
Vancouveria planipetala	36	11	0.977	17.896	1
Venegasia carpesioides	64	21	0.98	18.544	1
Verbena lasiostachys var. lasiostachys	74	24	0.872	5.877	1
Vicia hassei	32	10	0.924	19.163	0.8
Viguiera laciniata	105	34	0.995	14.116	0.970588
Viola douglasii	106	35	0.865	5.065	0.885714
Viola lobata subsp. lobata	65	21	0.958	3.725	0.952381
Viola pedunculata	179	59	0.962	6.812	0.983051
Viola pinetorum subsp. pinetorum	33	10	0.908	4.246	0.9
Viola purpurea subsp. quercetorum	99	32	0.955	10.561	0.9375
Wyethia helenioides	60	19	0.923	12.307	0.894737
Wyethia ovata	41	13	0.953	14.45	0.923077
Xylococcus bicolor	107	34	0.988	22.076	0.941176
Zigadenus fremontii	153	50	0.96	19.184	0.92
Average values	72.7174	23.6176	0.954381	16.0953	0.927064
